# Supplementary material for: The Immunomodulatory Effects of a 6-Month Extra Virgin Olive Oil Intervention on Monocyte Cytokine Secretion and Plasma Cytokine Levels in Dyslipidemic and Post-Infarct Patients: A Clinical Pilot Study
Source: MDPI journal article supplement (doi:10.3390/nu15173819), 2023-08-31
Supplement: s1 [file s1]

# The Immunomodulatory Effects of a 6-Month Extra Virgin Olive Oil Intervention on Monocyte Cytokine Secretion and Plasma Cytokine Levels in Dyslipidemic and Post-Infarct Patients: A Clinical Pilot Study

Adrien Zimmer <sup>1</sup>, Alyanne Otrante <sup>1</sup>, Nada Zoubdane<sup>1</sup>, Michel Nguyen <sup>2</sup>, Tamas Fülöp <sup>1</sup> and Abdelouahed Khalil <sup>1,3,4,\*</sup>

## Supplementary Materials:

### Flow Cytometry analysis

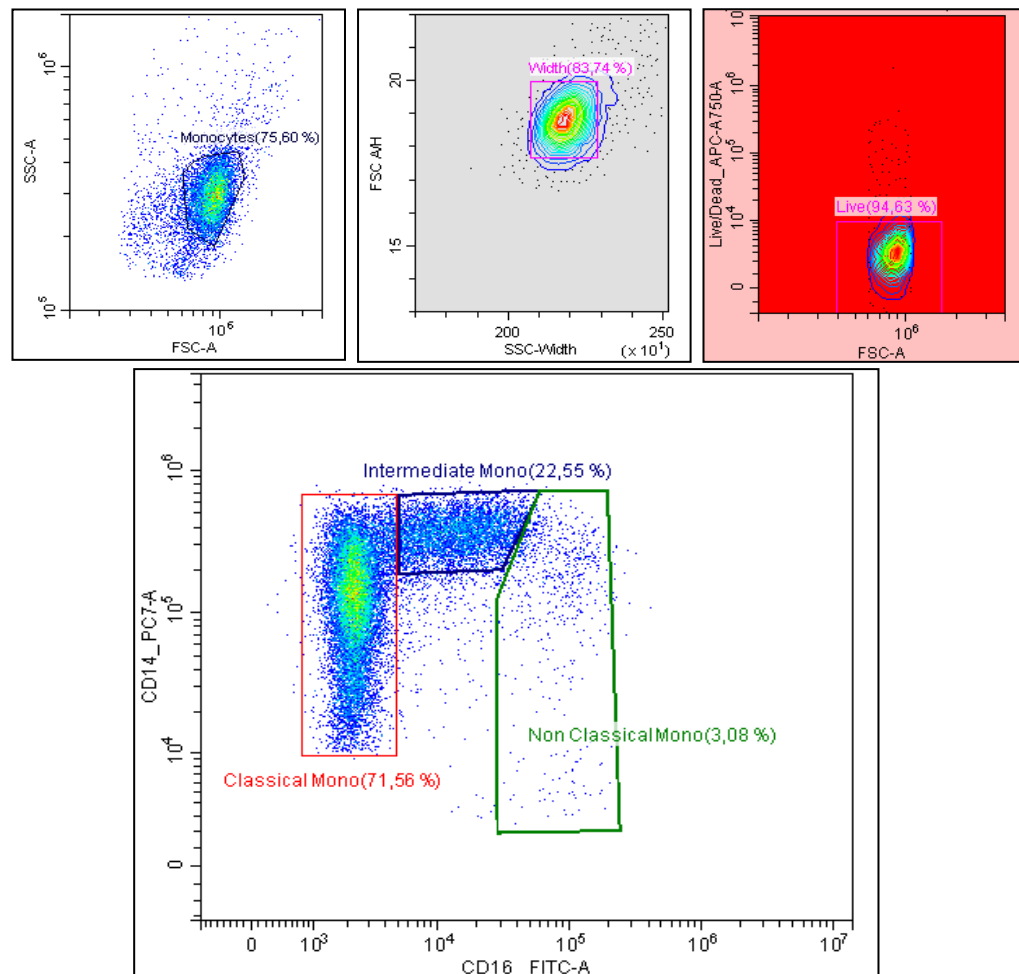

**Figure S1:** Gating strategy for identification of monocyte subsets.

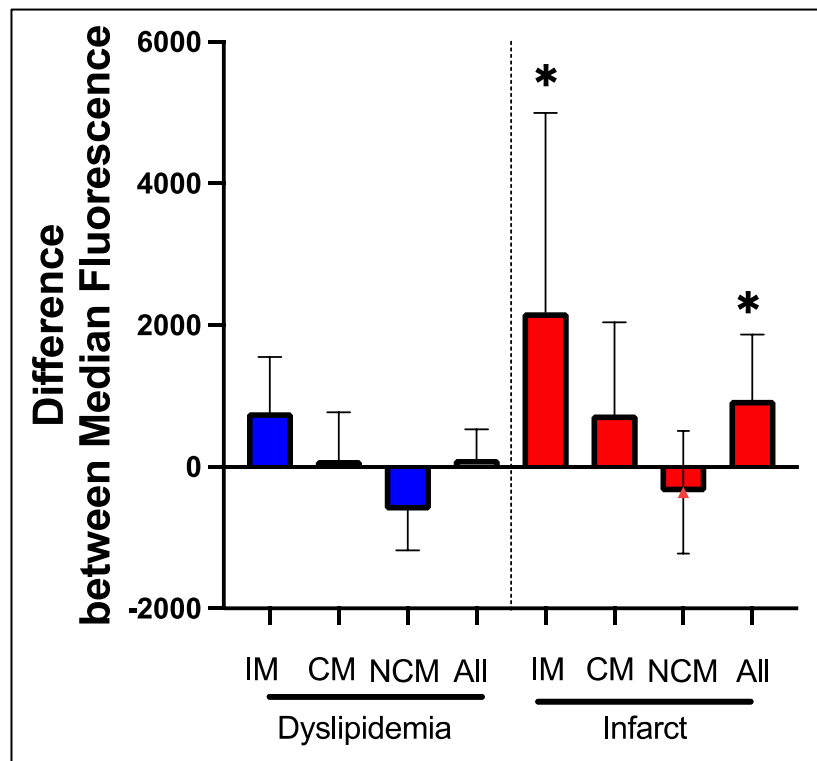

**Figure S2:** Effect of EVOO on IL-1b production in dyslipidemic and post-infarct patients. IM: intermediate monocytes, CM: classical monocytes, NCM: non-classical monocytes, all monocytes. \*  $p < 0.05$ .

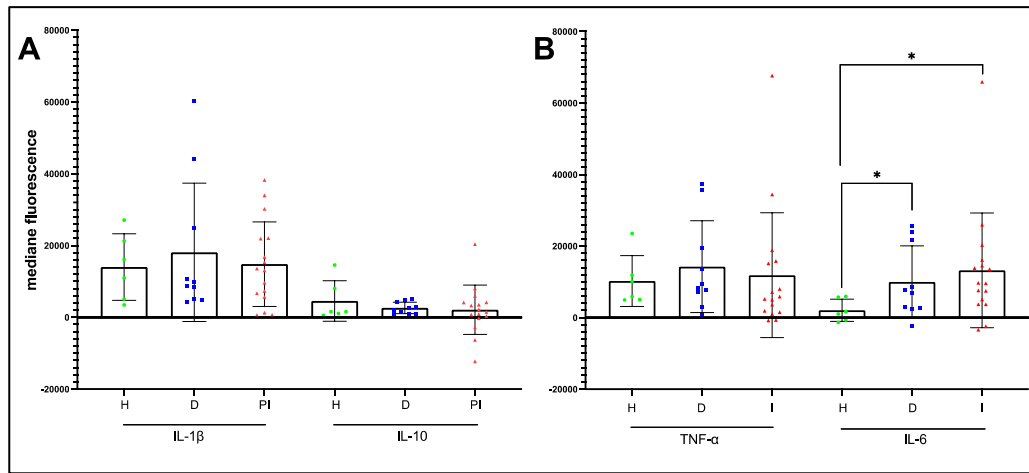

**Figure S3:** Median fluorescence differential between LPS stimulated Classical monocyte and Classical monocytes at quiescence for each studied cytokine pre-intervention. (A) for IL-1 $\beta$  and IL-10. (B) for TNF- $\alpha$  and IL-6. Acronyms H represents Healthy. D represents Dyslipidemia and I represents the post-infarcts patient cohorts. \*  $p < 0.05$

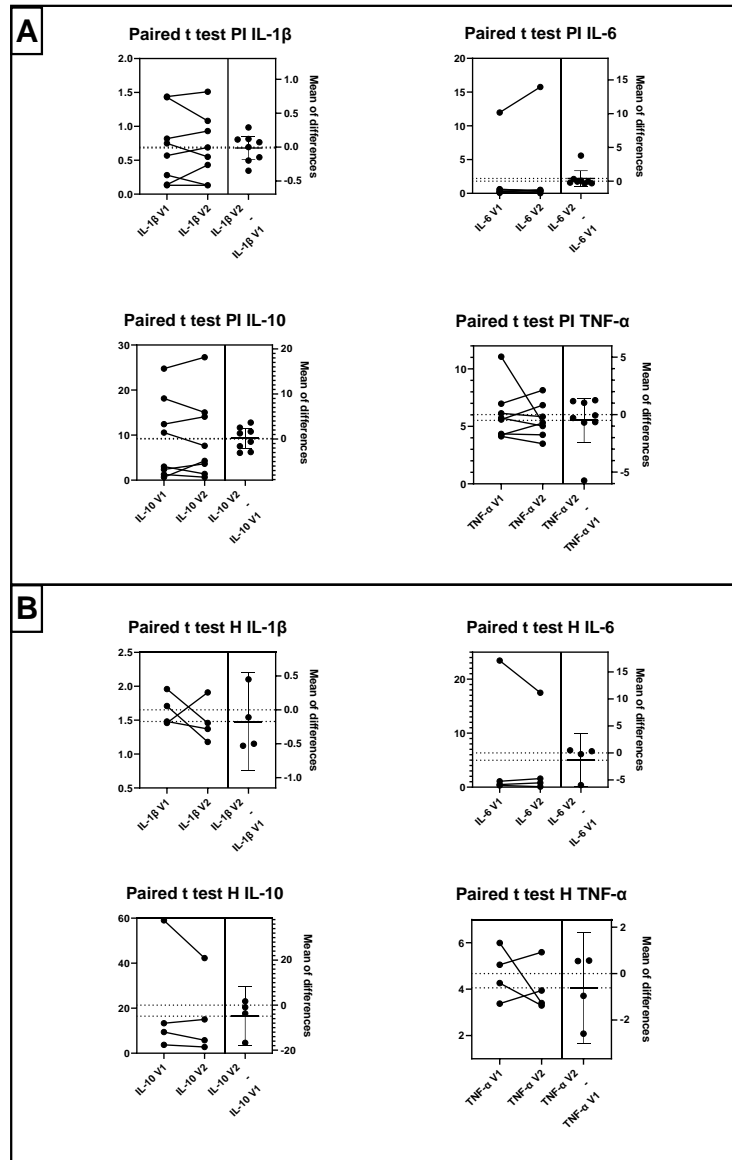

**Figure S4:** Estimated Paired T-test for IL-1 $\beta$ . IL-10. TNF- $\alpha$  and IL-6. No significant *differences where observed*.
